# Supplementary material
Source: PubMed Central journal article supplement (PMC6459127)
Supplement: jamaoncol-5-491-s001.pdf [file jamaoncol-5-491-s001.pdf]

Wan X, Zhang Y, Tan C, Zeng X, Peng L. First-line Nivolumab Plus Ipilimumab vs Sunitinib for Metastatic Renal Cell Carcinoma: A Cost-Effectiveness Analysis [published online February 21, 2019]. *JAMA Oncol*. doi:10.1001/jamaoncol.2018.7086

**eTable 1: Model parameters: baseline values, ranges, and distributions for sensitivity analysis**

**eTable 2: Background mortality rate**

**eTable 3: Drug dose and costs**

**eTable 4: Results for subgroup analyses**

**eFigure 1: Markov model simulating outcomes for the CheckMate 214 trial**

**eFigure 2: Results of two-way sensitivity analyses for utility values**

This supplementary material has been provided by the authors to give readers additional information about their work.

**eTable 1. Model parameters: baseline values, ranges, and distributions for sensitivity analysis**

| Variable                                                 | Baseline value                             | Range   |         | Reference for baseline value | Distribution (parameters) |
|----------------------------------------------------------|--------------------------------------------|---------|---------|------------------------------|---------------------------|
|                                                          |                                            | Minimum | Maximum |                              |                           |
| HR of IN versus sunitinib for OS                         | 0.63                                       | 0.44    | 0.89    | [5]                          | Normal (-0.46, 0.18)*     |
| HR of IN versus sunitinib for PFS                        | 0.82                                       | 0.64    | 1.05    | [5]                          | Normal (-0.20, 0.13)*     |
| Log-logistic PFS survival model with sunitinib           | $\lambda=0.04128308,$<br>$\gamma=1.452671$ | -       | -       | [5]                          | -                         |
| Weibull OS survival model with sunitinib                 | $\lambda=0.01974261,$<br>$\gamma=1.09098$  | -       | -       | [5]                          | -                         |
| Weibull OS survival model with nivolumab plus ipilimumab | $\lambda=0.012437844,$<br>$\gamma=1.09098$ | -       | -       | [5]                          | -                         |
| Background mortality rate                                | Age specific                               |         |         | [9]                          |                           |
| Rate of treatment discontinuation due to AEs             |                                            |         |         |                              |                           |
| IN                                                       | 0.220                                      | 0.170   | 0.260   | [5]                          | Beta (118,429)            |
| Sunitinib                                                | 0.120                                      | 0.090   | 0.140   | [5]                          | Beta (63,472)             |
| IN AEs incidence                                         |                                            |         |         |                              |                           |
| Fatigue                                                  | 0.040                                      | 0.030   | 0.050   | [5]                          | Beta (23,524)             |
| Hypertension                                             | 0.070                                      | 0.060   | 0.080   | [5]                          | Beta (4, 543)             |
| Thrombocytopenia                                         | 0                                          | 0       | 0       | [5]                          | -                         |
| Palmar-Plantar Erythrodysesthesia                        | 0                                          | 0       | 0       | [5]                          | -                         |
| Sunitinib AEs incidence                                  |                                            |         |         |                              |                           |
| Fatigue                                                  | 0.090                                      | 0.070   | 0.110   | [5]                          | Beta (49, 486)            |
| Hypertension                                             | 0.160                                      | 0.130   | 0.190   | [5]                          | Beta (85, 450)            |
| Thrombocytopenia                                         | 0.050                                      | 0.040   | 0.060   | [5]                          | Beta (25, 510)            |
| Palmar-Plantar Erythrodysesthesia                        | 0.090                                      | 0.070   | 0.110   | [5]                          | Beta (49,486)             |
| IN second-line therapy proportion                        |                                            |         |         |                              |                           |
| Sunitinib                                                | 0.20                                       | 0.160   | 0.240   | [5]                          | Beta (111, 439)           |
| Pazopanib                                                | 0.130                                      | 0.104   | 0.156   | [5]                          | Beta (72,478)             |
| Cabozantinib                                             | 0.060                                      | 0.048   | 0.072   | [5]                          | Beta (261, 4089)          |
| Sunitinib second-line therapy proportion                 |                                            |         |         |                              |                           |

|                                      |          |          |          |         |                   |
|--------------------------------------|----------|----------|----------|---------|-------------------|
| Nivolumab                            | 0.270    | 0.216    | 0.324    | [5]     | Beta (147,399)    |
| Axitinib                             | 0.190    | 0.152    | 0.228    | [5]     | Beta (106,440)    |
| Cabozantinib                         | 0.080    | 0.064    | 0.096    | [5]     | Beta (255, 2938)  |
| Utility (SD)                         |          |          |          |         |                   |
| In the first-line sunitinib          | 0.73     | 0.58     | 0.88     | [10]    | Beta (26, 10)     |
| In the first-line IN                 | 0.82     | 0.65     | 0.98     | [5, 10] | Beta (17, 4)      |
| In second-line therapy               | 0.66     | 0.52     | 0.79     | [11]    | Beta (33, 17)     |
| Patients' weight, kg                 | 70       | 40       | 200      | [14]    | Gamma (8, 0.1)    |
| Drug cost, \$/per cycle              |          |          |          |         |                   |
| IN                                   | 32213.44 | 25770.75 | 38656.13 | [15]    | Gamma (100,0.003) |
| Nivolumab (maintenance phase)        | 19551.60 | 15641.28 | 23461.92 | [15]    | Gamma (100,0.005) |
| Axitinib                             | 16703.40 | 13362.72 | 20044.08 | [16]    | Gamma (100,0.006) |
| Cabozantinib                         | 19249.86 | 15399.89 | 23099.83 | [16]    | Gamma (100,0.005) |
| Sunitinib                            | 10761.52 | 8609.22  | 12913.82 | [17]    | Gamma (100,0.009) |
| Pazopanib                            | 9982.56  | 7986.05  | 11979.07 | [17]    | Gamma (100,0.010) |
| AEs cost, \$US                       |          |          |          |         |                   |
| Fatigue                              | 0        | 0        | 0        | [18]    | -                 |
| Hypertension                         | 61.90    | 49.52    | 74.28    | [18]    | Gamma (100,1.616) |
| Thrombocytopenia                     | 9400.00  | 7520.00  | 11280.00 | [19]    | Gamma (100,0.011) |
| Palmar-Plantar<br>Erythrodysesthesia | 43.64    | 34.91    | 52.37    | [20]    | Gamma (100,2.291) |
| Administration                       | 139.61   | 111.69   | 167.53   | [22]    | Gamma (100,0.716) |

HR= hazard ratio; IN= nivolumab plus ipilimumab; OS= overall survival; PFS= progression free survival; AE=adverse event;

\*A lognormal distribution was used for hazard ratio: a normal distribution was firstly fit to log hazard ratio and then the result was exponentiated.

**eTable 2 Background mortality rate**

Estimates of background mortality rate or each age were provided in the US life table available in the following publication.

Arias E, Heron M, Xu J. United States Life Tables, 2014. Natl Vital Stat Rep. 2017;66:1-64.

| Age | Background mortality rate | Age | Background mortality rate | Age | Background mortality rate |
|-----|---------------------------|-----|---------------------------|-----|---------------------------|
| 21  | 0.000795                  | 51  | 0.004484                  | 81  | 0.055475                  |
| 22  | 0.000858                  | 52  | 0.004874                  | 82  | 0.061509                  |
| 23  | 0.000898                  | 53  | 0.005302                  | 83  | 0.068675                  |
| 24  | 0.000923                  | 54  | 0.005771                  | 84  | 0.076701                  |
| 25  | 0.000943                  | 55  | 0.006274                  | 85  | 0.085469                  |
| 26  | 0.000968                  | 56  | 0.006793                  | 86  | 0.095935                  |
| 27  | 0.000994                  | 57  | 0.007321                  | 87  | 0.107533                  |
| 28  | 0.001024                  | 58  | 0.007854                  | 88  | 0.120347                  |
| 29  | 0.001058                  | 59  | 0.008403                  | 89  | 0.134457                  |
| 30  | 0.001095                  | 60  | 0.008999                  | 90  | 0.149939                  |
| 31  | 0.001132                  | 61  | 0.009652                  | 91  | 0.166861                  |
| 32  | 0.001171                  | 62  | 0.010341                  | 92  | 0.185276                  |
| 33  | 0.001213                  | 63  | 0.011056                  | 93  | 0.205223                  |
| 34  | 0.00126                   | 64  | 0.011804                  | 94  | 0.226719                  |
| 35  | 0.001319                  | 65  | 0.012598                  | 95  | 0.24976                   |
| 36  | 0.001389                  | 66  | 0.013484                  | 96  | 0.274312                  |
| 37  | 0.001467                  | 67  | 0.014501                  | 97  | 0.300311                  |
| 38  | 0.00155                   | 68  | 0.015701                  | 98  | 0.327661                  |
| 39  | 0.001639                  | 69  | 0.017146                  | 99  | 0.356235                  |
| 40  | 0.001743                  | 70  | 0.018855                  | 100 | 1                         |
| 41  | 0.001864                  | 71  | 0.020762                  |     |                           |
| 42  | 0.002001                  | 72  | 0.022816                  |     |                           |
| 43  | 0.002159                  | 73  | 0.02501                   |     |                           |
| 44  | 0.002345                  | 74  | 0.027353                  |     |                           |
| 45  | 0.002547                  | 75  | 0.029897                  |     |                           |
| 46  | 0.002778                  | 76  | 0.03287                   |     |                           |
| 47  | 0.003059                  | 77  | 0.036315                  |     |                           |
| 48  | 0.003391                  | 78  | 0.040253                  |     |                           |
| 49  | 0.003753                  | 79  | 0.044908                  |     |                           |
| 50  | 0.004118                  | 80  | 0.049974                  |     |                           |

**eTable 3: Drug dose and costs**

| <b>Drug</b>                              | <b>Dose</b>                                           | <b>Unit price (\$)</b> | <b>Cost for 1 model cycle (\$, 6 wks)</b> |
|------------------------------------------|-------------------------------------------------------|------------------------|-------------------------------------------|
| Nivolumab (induction phase)              | 3 mg/kg * 70 kg every 3 weeks for 4 doses             | 27.155/mg              | 11405.10                                  |
| Nivolumab (maintenance phase)            | 240 mg every 2 weeks                                  | 27.155/mg              | 19551.60                                  |
| Ipilimumab                               | 1 mg/kg * 70 kg every 3 weeks for 4 doses             | 148.631/mg             | 20808.34                                  |
| Nivolumab plus ipilimumab cost per cycle | Nivolumab (induction phase) + ipilimumab              |                        | 32213.44                                  |
| Sunitinib                                | 50 mg/d for 4 weeks followed by 2 weeks off treatment | 384.340/50mg           | 10761.52                                  |
| Cabozantinib                             | 60mg/d                                                | 458.330/60mg           | 19249.86                                  |
| Pazopanib                                | 800mg/d                                               | 59.420/200mg           | 9982.560                                  |
| Axitinib                                 | 5mg twice/d                                           | 198.850/5mg            | 16703.40                                  |

**eTable 4 Results for subgroup analyses**

| Subgroup                      | Sample size           |           | OS HR (95% CI)   | ICER (95% CI)                     | Cost-effectiveness probability at WTP |                |
|-------------------------------|-----------------------|-----------|------------------|-----------------------------------|---------------------------------------|----------------|
|                               | Nivolumab +Ipilimumab | Sunitinib |                  |                                   | \$100,000/QALY                        | \$150,000/QALY |
| Age                           |                       |           |                  |                                   |                                       |                |
| < 65 yr                       | 265                   | 259       | 0.53 (0.40–0.71) | 95,460 (52,547 to 177,323)        | 56%                                   | 93%            |
| ≥ 65 and < 75 yr              | 125                   | 133       | 0.86 (0.58–1.27) | 178,565 (-1,082,934 to 1,325,930) | 20%                                   | 42%            |
| ≥ 75yr                        | 35                    | 30        | 0.97 (0.48–1.95) | 313,117 (-1,160,294 to 1,226,019) | 18%                                   | 34%            |
| Sex                           |                       |           |                  |                                   |                                       |                |
| Male                          | 314                   | 301       | 0.71 (0.55–0.92) | 123,292 (44,941 to 374,534)       | 31%                                   | 68%            |
| Female                        | 111                   | 121       | 0.52 (0.34–0.78) | 94,405 (52,061 to 191,668)        | 59%                                   | 92%            |
| Region                        |                       |           |                  |                                   |                                       |                |
| United States                 | 112                   | 110       | 0.64 (0.40–1.00) | 109,951 (37,371 to 393,168)       | 42%                                   | 76%            |
| Canada and Europe             | 148                   | 147       | 0.70 (0.49–1.01) | 121103 (34,322 to 487,429)        | 35%                                   | 69%            |
| Rest of the world             | 165                   | 165       | 0.63 (0.45–0.89) | 108,363 (46,968 to 275,286)       | 43%                                   | 80%            |
| Baseline IMDC prognostic risk |                       |           |                  |                                   |                                       |                |
| Intermediate                  | 314                   | 317       | 0.66 (0.50–0.87) | 113,336 (48,503 to 279,532)       | 37%                                   | 77%            |
| Poor                          | 102                   | 97        | 0.57 (0.39–0.82) | 100,060 (50,266 to 227,695)       | 51%                                   | 87%            |
| Previous nephrectomy          |                       |           |                  |                                   |                                       |                |
| Yes                           | 341                   | 319       | 0.69 (0.53–0.89) | 119,022 (46,473 to 347,110)       | 36%                                   | 72%            |
| No                            | 84                    | 103       | 0.63 (0.42–0.94) | 108,363 (46,511 to 339,422)       | 43%                                   | 79%            |
| Baseline PD-L1 expression     |                       |           |                  |                                   |                                       |                |
| <1%                           | 284                   | 278       | 0.73 (0.56–0.96) | 124719 (-89,051 to 182,742)       | 32%                                   | 67%            |
| ≥1%                           | 100                   | 114       | 0.45 (0.29–0.71) | 86,390 (42,372 to 129,817)        | 72%                                   | 97%            |
| Bone metastases               |                       |           |                  |                                   |                                       |                |
| Yes                           | 84                    | 89        | 0.71 (0.47–1.08) | 123,292 (-92,494 to 551,413)      | 34%                                   | 66%            |
| No                            | 341                   | 333       | 0.64 (0.49–0.82) | 109951 (49,056 to 250,882)        | 40%                                   | 81%            |
| Liver metastases              |                       |           |                  |                                   |                                       |                |

|                       |     |     |                  |                                 |     |     |
|-----------------------|-----|-----|------------------|---------------------------------|-----|-----|
| Yes                   | 88  | 89  | 0.64 (0.42–0.96) | 109,951 (41,516 to 373,075)     | 42% | 78% |
| No                    | 337 | 333 | 0.66 (0.51–0.85) | 113,336 (48,419 to 273,130)     | 38% | 78% |
| Lung metastases       |     |     |                  |                                 |     |     |
| Yes                   | 294 | 296 | 0.61 (0.47–0.78) | 105,378 (50,172 to 217,535)     | 45% | 86% |
| No                    | 131 | 126 | 0.81 (0.53–1.22) | 153,568 (-733,088 to 1,122,851) | 23% | 49% |
| Lymph-node metastases |     |     |                  |                                 |     |     |
| Yes                   | 190 | 216 | 0.79 (0.59–1.07) | 145,916 (-251,792 to 726,544)   | 24% | 53% |
| No                    | 235 | 206 | 0.55 (0.40–0.76) | 97,680 (52,546 to 196,330)      | 53% | 91% |

OS= overall survival; HR= hazard ratio; CI= confidence interval/credible intervals; ICER=incremental cost-effectiveness ratio; WTP=willingness-to-pay; QALY= quality-adjusted life year;

**eFigure 1 Markov model simulating outcomes for the CheckMate 214 trial**

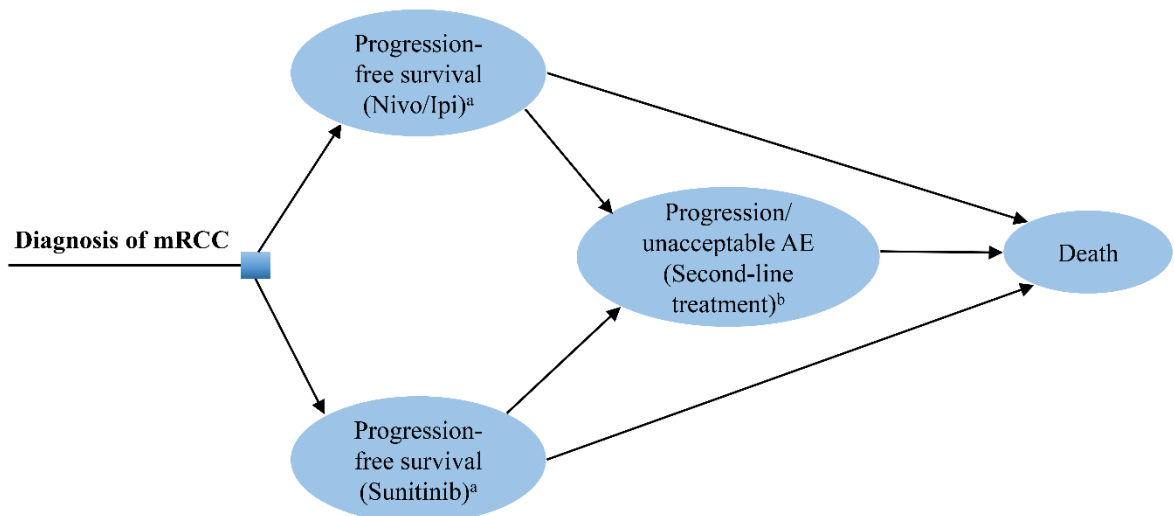

<sup>a</sup>Regimen in the parentheses represent the treatments the patients received until disease progression or unacceptable toxicity. <sup>b</sup>Upon progression of the disease or unacceptable toxicity, both groups could receive second-line treatment until death. mRCC, metastatic renal cell carcinoma; Nivo, nivolumab; Ipi, ipilimumab; AE, adverse event.



**eFigure 2 Results of two-way sensitivity analyses for utility values**

**Sensitivity Analysis on Utility\_IN and Utility\_Sun  
(Net Benefit, WTP=\$150,000/QALY)**

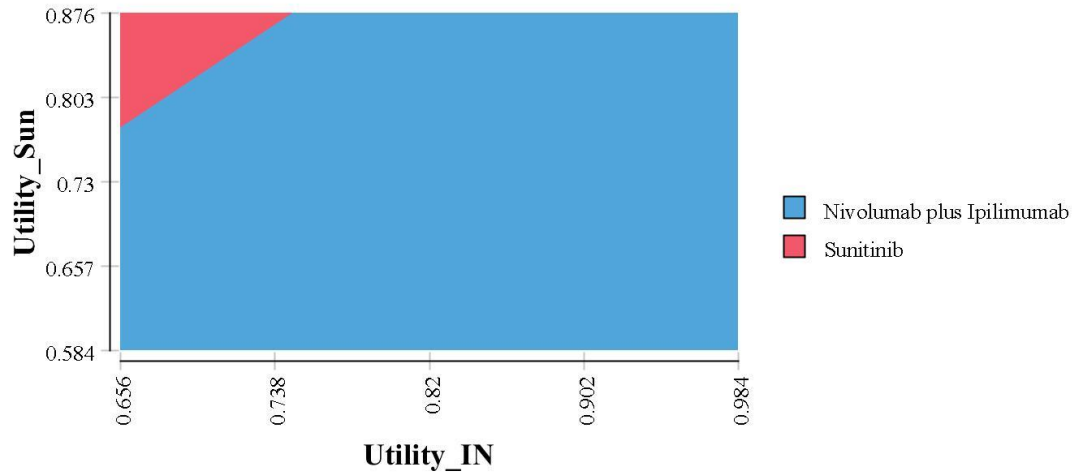

When the utility value for sunitinib was 0.782, if the value of nivolumab plus ipilimumab was greater than 0.656, the ICER will be lower than \$150,000/QALY, suggesting that nivolumab plus ipilimumab is likely to be cost effective across the majority of utility combinations at a WTP threshold of \$150,000/QALY.
